# Supplementary material for: Flexible, in-plane, and all-solid-state micro-supercapacitors based on printed interdigital Au/polyaniline network hybrid electrodes on a chip
Source: Royal Society of Chemistry journal article supplement (doi:10.1039/c4ta05345a), 2014-01-01
Supplement: c4ta05345a1.pdf [file c4ta05345a1.pdf]

## Supporting information

### Flexible, in-plane and all-solid-state micro-supercapacitors based on printed interdigital Au/polyaniline networks hybrid electrodes on a chip

Haibo Hu,<sup>\*a</sup> Kun Zhang,<sup>a,b</sup> Shuxin Li,<sup>a</sup> Shulin Ji<sup>a</sup>, and Changhui Ye<sup>\*a</sup>

<sup>a</sup> Anhui Key Laboratory of Nanomaterials and Technology, and Key Laboratory of Materials Physics, Institute of Solid State Physics, Chinese Academy of Sciences, Hefei 230031, China. Telephone: +86-551-65595629; Fax: +86-551-65591434; E-mail: [chye@issp.ac.cn](mailto:chye@issp.ac.cn); [haibohu@issp.ac.cn](mailto:haibohu@issp.ac.cn)

<sup>b</sup> School of Materials Science and Engineering, Hefei University of Technology, Hefei 230039, China.

|                     | Set/Actual printing parameters |            |            |
|---------------------|--------------------------------|------------|------------|
| MSCs                | 300-MSC                        | 600-MSC    | 900-MSC    |
| L ( $\mu\text{m}$ ) | 6000/~6000                     | 6000/~6000 | 6000/~6000 |
| W ( $\mu\text{m}$ ) | 500/478                        | 500/513    | 500/517    |
| I ( $\mu\text{m}$ ) | 300/330                        | 600/622    | 900/912    |

**Table S1.** The detailed printing parameters of designed micro-electrodes of MSCs with different inter-space

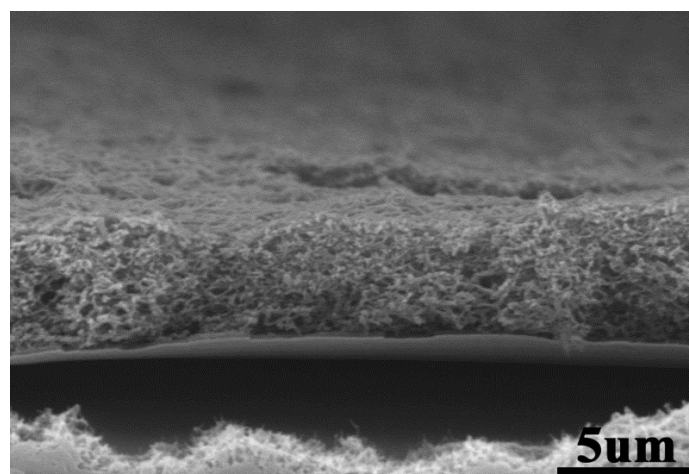

**Figure S1.** Cross-sectional SEM image of PANI networks on interdigital Au

electrodes grown within 300s.

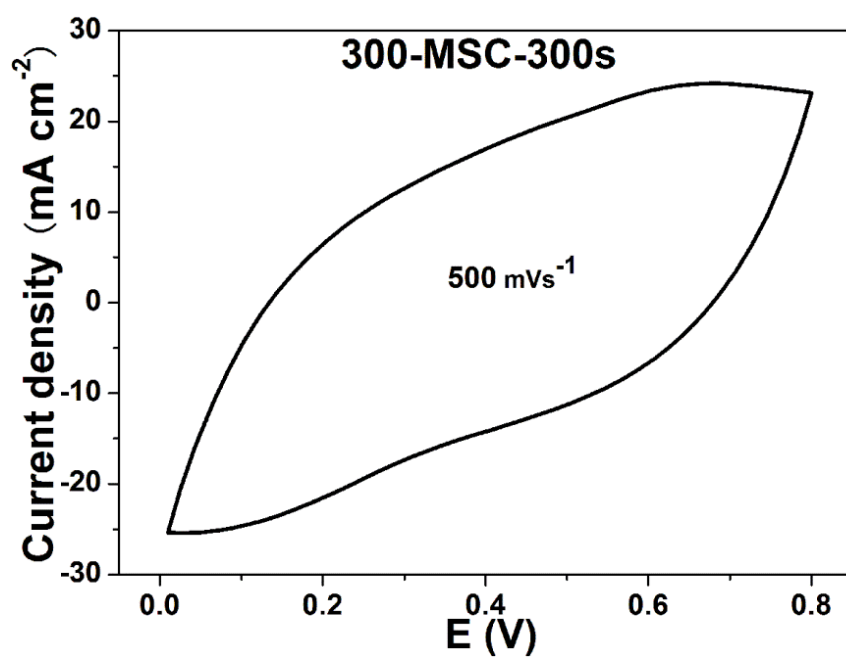

Figure S2. Cyclic voltammetry curves of 300-MSC-300s at a high scan rate of 500 mVs<sup>-1</sup>.
